# Supplementary material for: Survival Impact of Residual Cancer Cells in Intraoperative Peritoneal Washes following Radical Hysterectomy for Cervical Cancer
Source: MDPI journal article supplement (doi:10.3390/jcm11092659), 2022-05-09
Supplement: s1 [file s1]

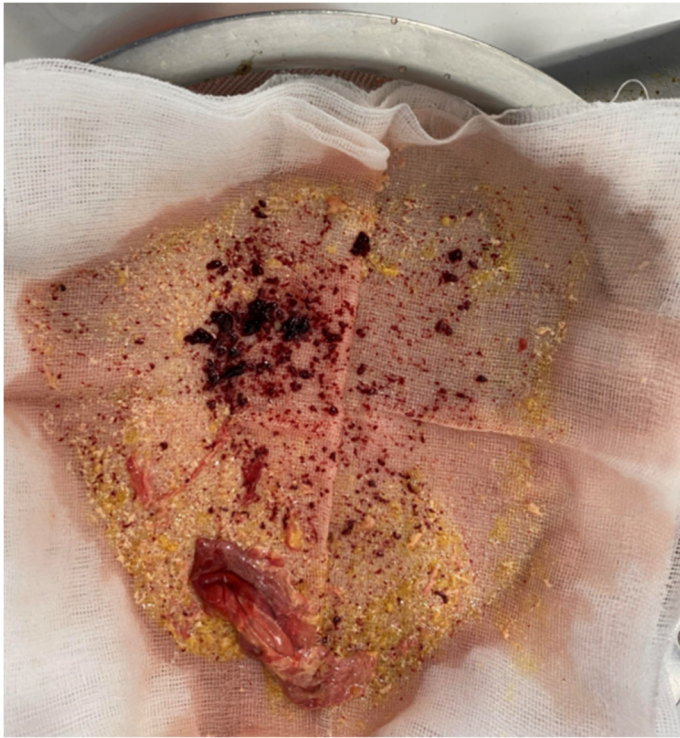

**Figure S1.** Residual aspirates of intraoperative peritoneal washes during redial hysterectomy.
